# Supplementary material for: A Systematic Review and Meta-Analysis of Proteomics Literature on the Response of Human Skeletal Muscle to Obesity/Type 2 Diabetes Mellitus (T2DM) Versus Exercise Training
Source: MDPI journal article supplement (doi:10.3390/proteomes5040030), 2017-11-11
Supplement: s1 [file s1]

Supplementary Table 1 summarises the main content (RQ1) of each article according to the PICO principle, which includes Population, Indicator, Comparison and Outcome measures. The earliest reported study meeting the eligibility criteria was Højlund et al. published in 2003 (Hojlund et al. 2003), therefore the current review considers literature over a 12 year study period from 2003 to 2016.

Note-OB is obesity, MOB is Morbidly obese, T2DM is type 2 diabetes mellitus, HT is hypertension, OWHLT is overweight with healthy, LEHLT is lean with healthy, LEOW is lean with slightly overweight, NGT is non-glucose tolerance, OCs is Obese-control

\*presented significant difference at p-value <0.05 or under

| Reference                     | Participants (M/F)                                 | Study groups                       |                                        | Method in proteomics    | Outcome measures         |                                                                            |                                                |
|-------------------------------|----------------------------------------------------|------------------------------------|----------------------------------------|-------------------------|--------------------------|----------------------------------------------------------------------------|------------------------------------------------|
|                               |                                                    | Case                               | Control                                |                         | Uniprot accession number | Protein name (gene name)*                                                  |                                                |
| Højlund et al.<br>2003        | N=15 (8/7)<br><br>Vastus lateralis (biopsy & cell) | T2DM                               | OWHLT                                  | 2D-DIGE                 | Up-regulation (6)        |                                                                            |                                                |
|                               |                                                    | n = 9 (5/4)                        | n = 6 (3/3)                            | pH 4-7                  | P08238                   | Heat shock protein HSP 90-beta                                             | HSP90AB1 (HSP90AB1 HSP90B, HSPC2, HSPCB )      |
|                               |                                                    | age 45 ± 2 y                       | age 46 ± 2 y                           |                         | P11021                   | 78 kDa glucose-regulated protein                                           | GRP78 (HSPA5 GRP78 )                           |
|                               |                                                    | BMI 33.3± 1.9 kg.m <sup>-2</sup>   | BMI 25.7 ± 1.2 kg.m <sup>-2</sup>      | MALDI-TOF (P-32)        | P12109                   | Collagen alpha-1(VI) chain                                                 | COL6A1 (COL6A1)                                |
|                               |                                                    |                                    |                                        |                         | P12277                   | Creatine kinase B-type                                                     | KCRB (CKB CKBB )                               |
|                               |                                                    |                                    |                                        |                         | P36871                   | Phosphoglucomutase-1                                                       | PGM1 (PGM1 )                                   |
|                               |                                                    |                                    |                                        |                         | Q96A32                   | Myosin regulatory light chain 2, skeletal muscle isoform                   | MLRS (MYLPF)                                   |
|                               |                                                    |                                    |                                        |                         | Down-regulation (2)      |                                                                            |                                                |
|                               |                                                    |                                    |                                        |                         | P06576                   | ATP synthase subunit beta, mitochondrial                                   | ATPB (ATP5B)                                   |
|                               |                                                    |                                    |                                        |                         | P10916                   | Myosin regulatory light chain 2, ventricular/cardiac muscle isoform        | MLRV                                           |
| Hittel et al.<br>2005         | N=18 (0/18)<br><br>Rectus abdominus                | OW/OB                              | LEHLT                                  | 2D-DIGE                 | Up-regulation (3)        |                                                                            |                                                |
|                               |                                                    | n = 6 (0/6)                        | n = 6                                  | pH 3-10 11 cm           |                          |                                                                            |                                                |
|                               |                                                    | age 44 ± 3 y                       | age 45 ± 3 y                           |                         |                          |                                                                            |                                                |
|                               |                                                    | BMI 30.2 ± 0.81 kg.m <sup>-2</sup> | BMI 23.8 ± 0.58 kg.m <sup>-2</sup>     | MALDI-TOF               | P00568                   | Adenylate kinase isoenzyme 1                                               | KAD1 (AK1)                                     |
|                               |                                                    |                                    |                                        |                         | P04075                   | Fructose-bisphosphate aldolase A                                           | ALDOA (ALDOA ALDA )                            |
|                               |                                                    | MOB                                |                                        |                         | P04406                   | Glyceraldehyde-3-phosphate dehydrogenase                                   | G3P (GAPDH GAPD, CDABP0047, OK/SW-cl.12 )      |
|                               |                                                    | n = 6 (0/6)                        |                                        |                         | Down-regulation (0)      |                                                                            |                                                |
|                               |                                                    | age 38 ± 3 y                       |                                        |                         |                          |                                                                            |                                                |
|                               |                                                    | BMI 53.8 ± 3.5 kg.m <sup>-2</sup>  |                                        |                         |                          |                                                                            |                                                |
|                               |                                                    | Lefort et al.<br>2010              | N = 34 (18/16)<br><br>Vastus lateralis | OB (with pre-HT/pre-DM) | LEOW (with pre-HT)       | 1D-SDS-PAGE (12%)                                                          | Up-regulation (10)                             |
| n = 14 (7/7)                  | n = 20 (11/9)                                      |                                    |                                        | HPLC-MS/MS              | A6NNS2                   | Dehydrogenase/reductase SDR family member 7C                               | DRS7C (DHRS7C SDR32C2 )                        |
| age 38 ± 4 y                  | age 38 ± 3 y                                       |                                    |                                        |                         | O14983                   | Sarcoplasmic/endoplasmic reticulum calcium ATPase 1                        | AT2A1 (SERCA1)                                 |
| BMI 36 ± 1 kg.m <sup>-2</sup> | BMI 25 ± 1 kg.m <sup>-2</sup>                      |                                    |                                        |                         | P02647                   | Apolipoprotein A-I                                                         | APOA1 (APOA1)                                  |
|                               |                                                    |                                    |                                        |                         | P11217                   | Glycogen phosphorylase, muscle form                                        | PYGM (PYGM )                                   |
|                               |                                                    |                                    |                                        |                         | P12882                   | Myosin-1                                                                   | MYH1 (MYH1 )                                   |
|                               |                                                    |                                    |                                        |                         | P27105                   | Erythrocyte band 7 integral membrane protein                               | STOM (STOM)                                    |
|                               |                                                    |                                    |                                        |                         | P32119                   | Peroxisedoxin-2                                                            | PRDX2 (Prdx2 Tdpx1, Tpx)                       |
|                               |                                                    |                                    |                                        |                         | P54289                   | Voltage-dependent calcium channel subunit alpha-2/delta-1                  | CA2D1 (CACNA2D1 CACNL2A, CCHL2A, MHS3 )        |
|                               |                                                    |                                    |                                        |                         | Q9UHG3                   | Prenylcysteine oxidase 1                                                   | PCYOX (PCYOX1 KIAA0908, PCL1, UNQ597/PRO1183 ) |
|                               |                                                    |                                    |                                        |                         | Q9UKX2                   | Myosin-2                                                                   | MYH2 (MYH2 MYHSA2 )                            |
|                               |                                                    |                                    |                                        |                         | Down-regulation (11)     |                                                                            |                                                |
|                               |                                                    |                                    |                                        |                         | E9PQ53                   | NADH dehydrogenase [ubiquinone] 1 subunit C2, isoform 2                    | NDUCR (NDUFC2-KCTD14 )                         |
|                               |                                                    |                                    |                                        |                         | O14958                   | Calsequestrin-2                                                            | CASQ2 (CASQ2)                                  |
|                               |                                                    |                                    |                                        |                         | O75306                   | NADH dehydrogenase [ubiquinone] iron-sulfur protein 2, mitochondrial       | NDUS2 (NDUFS2)                                 |
|                               |                                                    |                                    |                                        |                         | O95169                   | NADH dehydrogenase [ubiquinone] 1 beta subcomplex subunit 8, mitochondrial | NDUB8 (NDUFB8)                                 |
|                               |                                                    |                                    |                                        |                         | P05166                   | Propionyl-CoA carboxylase beta chain, mitochondrial                        | PCCB (PCCB )                                   |
|                               |                                                    |                                    |                                        |                         | P10606                   | Cytochrome c oxidase subunit 5B, mitochondrial                             | COX5B (COX5B)                                  |
|                               |                                                    |                                    |                                        |                         | P51970                   | NADH dehydrogenase [ubiquinone] 1 alpha subcomplex subunit 8               | NDUA8 (NDUFA8)                                 |
|                               |                                                    |                                    |                                        |                         | Q02252                   | Methylmalonate-semialdehyde dehydrogenase [acylating], mitochondrial       | MMSA (ALDH6A1 MMSDH )                          |
|                               |                                                    |                                    |                                        |                         | Q6ZMU5                   | Tripartite motif-containing protein 72                                     | TRI72 (TRIM72 MG53 )                           |
|                               |                                                    |                                    |                                        |                         | Q86Y39                   | NADH dehydrogenase [ubiquinone] 1 alpha subcomplex subunit 11              | NDUAB (NDUFA11)                                |
|                               |                                                    |                                    |                                        |                         | Q92523                   | Carnitine O-palmitoyltransferase 1, muscle isoform                         | CPT1B                                          |
| Hwang et al.<br>2010          | N = 24 (12/12)<br><br>Vastus lateralis             | OB (with pre-DM)                   | LEHLT                                  | 1D-SDS-PAGE             | Up-regulation (9)        |                                                                            |                                                |
|                               |                                                    | n = 8 (4/4)                        | n= 8 (4/4)                             | (4-20%)                 | O94760                   | N(G),N(G)-dimethylarginine dimethylaminohydrolase 1                        | DDAH1 (DDAH1 DDAH )                            |
|                               |                                                    | age 44 ± 3 y                       | age 37 ± 4 y                           | HPLC-MS/MS              | P30101                   | Protein disulfide-isomerase A3                                             | PDIA3 (PDIA3 ERP57, ERP60, GRP58 )             |
|                               |                                                    | BMI 31.6 ± 0.8 kg.m <sup>-2</sup>  | BMI 24.3 ± 0.8 kg.m <sup>-2</sup>      |                         | P47897                   | Glutamine--tRNA ligase                                                     | SYQ (QARS)                                     |
|                               |                                                    |                                    |                                        |                         | P49720                   | Proteasome subunit beta type-3                                             | PSB3 (PSMB3)                                   |

|                   |              |             |       |                                                                         |  |                                                                                                                                                                                                                                                                                                                                                                                                                                                                                                                                                                                                                                                                                                                                                                                                                                                                                                                                                                                                                                                                                                                                                                                                |                                                                                                                                                                                                                                                                                                                                                                                                                                                                                                                                                                                  |
|-------------------|--------------|-------------|-------|-------------------------------------------------------------------------|--|------------------------------------------------------------------------------------------------------------------------------------------------------------------------------------------------------------------------------------------------------------------------------------------------------------------------------------------------------------------------------------------------------------------------------------------------------------------------------------------------------------------------------------------------------------------------------------------------------------------------------------------------------------------------------------------------------------------------------------------------------------------------------------------------------------------------------------------------------------------------------------------------------------------------------------------------------------------------------------------------------------------------------------------------------------------------------------------------------------------------------------------------------------------------------------------------|----------------------------------------------------------------------------------------------------------------------------------------------------------------------------------------------------------------------------------------------------------------------------------------------------------------------------------------------------------------------------------------------------------------------------------------------------------------------------------------------------------------------------------------------------------------------------------|
|                   |              |             |       | T2DM<br>n= 8 (4/4)<br>age 48 ± 3 y<br>BMI 29.0 ± 1.1 kg.m <sup>-2</sup> |  | P50990 T-complex protein 1 subunit theta<br>P50991 T-complex protein 1 subunit delta<br>Q16543 Hsp90 co-chaperone Cdc37<br>Q93034 Cullin-5<br>Q9Y2K3 Myosin-15<br>Down-regulation (5)<br>Cytochrome c oxidase subunit 6C (Cytochrome c oxidase polypeptide VIc)<br>P14927 Cytochrome b-c1 complex subunit 7<br>P35609 Alpha-actinin-2<br>Q9NP98 Myozenin-1<br>Q9NX63 MICOS complex subunit MIC19                                                                                                                                                                                                                                                                                                                                                                                                                                                                                                                                                                                                                                                                                                                                                                                               | TCPQ (CCT8 C21orf112, CCTQ, KIAA0002 )<br>TCPD (CCT4 CCTD, SRB)<br>CDC37 (CDC37 CDC37A )<br>CUL5 (CUL5 VACM1 )<br>MYH15 (MYH15 KIAA1000)<br>COX6C (COX6C )<br>QCR7 (UQCRB UQBP )<br>ACTN2 (ACTN2)<br>MYOZ1<br>MIC19 (CHCHD3 MIC19, MINOS3 )                                                                                                                                                                                                                                                                                                                                      |
| Thingholm et al   | N=30         | OB          | LEHLT |                                                                         |  | Up-regulation (6)<br>P05413 Fatty acid-binding protein, heart<br>P11055 Myosin-3<br>P13535 Myosin-8<br>P24821 Tenascin<br>P60842 Eukaryotic initiation factor 4A-I<br>Q9UKX2 Myosin-2<br>Down-regulation (6)<br>O14558 Heat shock protein beta-6<br>P00325 Alcohol dehydrogenase 1B<br>P00813 Adenosine deaminase<br>P02647 Apolipoprotein A-I<br>P40121 Macrophage-capping protein<br>P69905 Hemoglobin subunit alpha                                                                                                                                                                                                                                                                                                                                                                                                                                                                                                                                                                                                                                                                                                                                                                         | FABPH (FABP3 FABP11, MDGI )<br>MYH3 (MYH3 )<br>MYH8 (MYH8 )<br>TENA (TNC)<br>IF4A1 (EIF4A1)<br>MYH2 (MYH2 MYHSA2 )<br>HSPB6 (HSPB6 )<br>ADHB1 (ADH1B ADH2 )<br>ADA (ADA ADA1)<br>APOA1 (APOA1)<br>CAPG (CAPG AFCP, MCP)<br>HBA (HBA1 HBA2)                                                                                                                                                                                                                                                                                                                                       |
| Giebelstein et al | N=31 (17/14) | OB (pre-DM) | LEHLT | 2D-DIGE                                                                 |  | Up-regulation (20)<br>O75323 Protein NipSnap homolog 2<br>P02679 Fibrinogen gamma chain<br>P04406 Glyceraldehyde-3-phosphate dehydrogenase<br>P05976 Myosin light chain 1/3, skeletal muscle isoform<br>P06732 Creatine kinase M-type<br>P11217 Glycogen phosphorylase, muscle form<br>P13929 Beta-enolase<br>P14618 Pyruvate kinase PKM<br>P15259 Phosphoglycerate mutase 2<br>P40925 Malate dehydrogenase, cytoplasmic<br>P45378 Troponin T, fast skeletal muscle<br>P54652 Heat shock-related 70 kDa protein 2<br>P55084 Trifunctional enzyme subunit beta, mitochondrial<br>P63267 Actin, gamma-enteric smooth muscle<br>P69905 Hemoglobin subunit alpha<br>Q13011 Delta(3,5)-Delta(2,4)-dienoyl-CoA isomerase, mitochondrial<br>Q14469 Transcription factor HES-1<br>Q96A32 Myosin regulatory light chain 2, skeletal muscle isoform<br>Q9H7C9 Mth938 domain-containing protein<br>Q9Y281 Cofilin-2<br>Down-regulation (6)<br>P08590 Myosin light chain 3<br>P10916 Myosin regulatory light chain 2, ventricular/cardiac muscle isoform<br>P13805 Troponin T, slow skeletal muscle<br>P17661 Desmin<br>P40123 Adenylyl cyclase-associated protein 2<br>P62736 Actin, aortic smooth muscle | NIPS2 (GBAS NIPSNAP2 )<br>FIBG (FGG PRO2061 )<br>G3P (GAPDH GAPD, CDABP0047, OK/SW-cl.12 )<br>MYL1<br>KCRM (KCRM )<br>PYGM (PYGM )<br>ENOB (ENO3)<br>KYPM (PKM OIP3, PK2, PK3, PKM2 )<br>PGAM2 (PGAM2 PGAMM )<br>MDHC (MDH1, MDHA)<br>TNNT3 (TNNT3)<br>HSP72 (HSPA2)<br>ECHB (HADHB MSTP029 )<br>ACTH (ACTG2 ACTA3, ACTL3, ACTSG )<br>HBA (HBA1 HBA2)<br>ECH1<br>HES1 (HES1 BHLHB39, HL, HRY )<br>MLRS (MYLPF)<br>AAMDC (AAMDC C11orf67, PTD015 )<br>COF2 (CFL2)<br>MYL3 (MYL3 )<br>MLRV<br>TNNT1 (TNNT1 TNT )<br>DESM (DES)<br>CAP2 (CAP2)<br>ACTA (ACTA2 ACTSA, ACTVS, GIG46 ) |

|                           |                                 |              |             |                                                    |                                                                                 |                                                           |
|---------------------------|---------------------------------|--------------|-------------|----------------------------------------------------|---------------------------------------------------------------------------------|-----------------------------------------------------------|
| Al-Khalili et al<br>2014a | N=20 (na/na)                    | T2DM<br>n=10 | NGT<br>n=10 | 2D-DIGE<br>pH 3-11<br>24cm<br><br>LC-MS/MS (CyDye) | Up-regulation (8)                                                               |                                                           |
|                           | Vastus lateralis<br>(cell line) |              |             |                                                    | P04792 Heat shock protein beta-1                                                | HSPB1 (HSPB1 HSP27, HSP28 )                               |
|                           |                                 |              |             |                                                    | P25786 Proteasome subunit alpha type-1                                          | PSA1 (PSMA1 HC2, NU, PROS30, PSC2 )                       |
|                           |                                 |              |             |                                                    | P25789 Proteasome subunit alpha type-4                                          | PSA4 (PSMA4 HC9, PSC9 )                                   |
|                           |                                 |              |             |                                                    | P49721 Proteasome subunit beta type-2                                           | PSB2 (PSMB2)                                              |
|                           |                                 |              |             |                                                    | P60900 Proteasome subunit alpha type-6                                          | PSA6 (PSMA6)                                              |
|                           |                                 |              |             |                                                    | P62195 26S protease regulatory subunit 8                                        | PRS8 (PSMC5 SUG1 )                                        |
|                           |                                 |              |             |                                                    | Q9BT22 Dehydrogenase/reductase SDR family member 4                              | DHRS4 (DHRS4 SDR25C2, UNQ851/PRO1800 )                    |
|                           |                                 |              |             |                                                    | Q9UBQ0 Vacuolar protein sorting-associated protein 29                           | VPS29 (VPS29 DC15, DC7, MDS007 )                          |
|                           |                                 |              |             |                                                    | Down-regulation (3)                                                             |                                                           |
|                           |                                 |              |             |                                                    | O75083 WD repeat-containing protein 1                                           | WDR1 (WDR1 )                                              |
|                           |                                 |              |             |                                                    | P14866 Heterogeneous nuclear ribonucleoprotein L                                | HNRPL (HNRNPL HNRPL, P/OKcl.14 )                          |
|                           |                                 |              |             |                                                    | Q13838 Spliceosome RNA helicase DDX39B                                          | DX39B (DDX39B BAT1, UAP56 )                               |
| Al-Khalili et al<br>2014b | N=20 (20/0)                     | T2DM (10/0)  | NGT (10/0)  | 2D-DIGE<br>pH 3-11 24cm<br><br>LC-MS/MS (CyDye)    | Up-regulation (29)                                                              |                                                           |
|                           | Vastus lateralis<br>(cell line) |              |             |                                                    | O75390 Citrate synthase, mitochondrial                                          | CISY (CS)                                                 |
|                           |                                 |              |             |                                                    | O75534 Cold shock domain-containing protein E1                                  | CSDE1 (CSDE1 D1S155E, KIAA0885, NRU, UNR )                |
|                           |                                 |              |             |                                                    | O96008 Mitochondrial import receptor subunit TOM40 homolog                      | TOM40 (TOMM40 C19orf1, PEREC1, TOM40 )                    |
|                           |                                 |              |             |                                                    | P13010 X-ray repair cross-complementing protein 5                               | XRCC5 (XRCC5 G22P2 )                                      |
|                           |                                 |              |             |                                                    | P14061 Estradiol 17-beta-dehydrogenase 1                                        | DHB1 (HSD17B1 E17KSR, EDH17B1, EDH17B2, EDHB17, SDR28C1 ) |
|                           |                                 |              |             |                                                    | P14866 Heterogeneous nuclear ribonucleoprotein L                                | HNRPL (HNRNPL HNRPL, P/OKcl.14 )                          |
|                           |                                 |              |             |                                                    | P23786 Carnitine O-palmitoyltransferase 2, mitochondrial                        | CPT2 (CPT2 CPT1 )                                         |
|                           |                                 |              |             |                                                    | P25705 ATP synthase subunit alpha, mitochondrial                                | ATPA (ATP5A1 ATP5A, ATP5AL2, ATPM )                       |
|                           |                                 |              |             |                                                    | P30044 Peroxiredoxin-5, mitochondrial                                           | PRDX5 (PRDX5 ACR1, SBBI10 )                               |
|                           |                                 |              |             |                                                    | P31040 Succinate dehydrogenase [ubiquinone] flavoprotein subunit, mitochondrial | SDHA                                                      |
|                           |                                 |              |             |                                                    | P34897 Serine hydroxymethyltransferase, mitochondrial                           | GLYM (SHMT2)                                              |
|                           |                                 |              |             |                                                    | P38117 Electron transfer flavoprotein subunit beta                              | ETFB (ETFB FP585 )                                        |
|                           |                                 |              |             |                                                    | P40926 Malate dehydrogenase, mitochondrial                                      | MDHM (MDH2)                                               |
|                           |                                 |              |             |                                                    | P42765 3-ketoacyl-CoA thiolase, mitochondrial                                   | THIM (ACAA2)                                              |
|                           |                                 |              |             |                                                    | P47897 Glutamine--tRNA ligase                                                   | SYQ (QARS)                                                |
|                           |                                 |              |             |                                                    | P49411 Elongation factor Tu, mitochondria                                       | EFTU (TUFM)                                               |
|                           |                                 |              |             |                                                    | P49748 Very long-chain specific acyl-CoA dehydrogenase, mitochondrial           | ACADV (ACADVL)                                            |
|                           |                                 |              |             |                                                    | P50213 Isocitrate dehydrogenase [NAD] subunit alpha, mitochondrial              | IDH3A (IDH3A)                                             |
|                           |                                 |              |             |                                                    | P83111 Serine beta-lactamase-like protein LACTB, mitochondrial                  | LACTB (LACTB MRPL56, UNQ843/PRO1781 )                     |
|                           |                                 |              |             |                                                    | Q02809 Procollagen-lysine,2-oxoglutarate 5-dioxygenase 1                        | PLOD1 (PLOD1 LLH, PLOD)                                   |
|                           |                                 |              |             |                                                    | Q12906 Interleukin enhancer-binding factor 3                                    | ILF3 (ILF3 DRBF, MPHOSPH4, NF90 )                         |
|                           |                                 |              |             |                                                    | Q12931 Heat shock protein 75 kDa, mitochondrial                                 | TRAP1 (TRAP1 HSP75 )                                      |
|                           |                                 |              |             |                                                    | Q13263 Transcription intermediary factor 1-beta                                 | TIF1B (TRIM28 KAP1, RNF96, TIF1B )                        |
|                           |                                 |              |             |                                                    | Q14191 Werner syndrome ATP-dependent helicase                                   | WRN (WRN RECO3, RECQL2 )                                  |
|                           |                                 |              |             |                                                    | Q92499 ATP-dependent RNA helicase DDX1                                          | DDX1 (DDX1)                                               |
|                           |                                 |              |             |                                                    | Q92945 Far upstream element-binding protein 2                                   | FUBP2 (KHSPRP FUBP2 )                                     |
|                           |                                 |              |             |                                                    | Q99798 Aconitate hydratase, mitochondrial                                       | ACON (ACO2)                                               |
|                           |                                 |              |             |                                                    | Q9HCC0 Methylcrotonoyl-CoA carboxylase beta chain, mitochondrial                | MCCB (MCCC2)                                              |
|                           |                                 |              |             |                                                    | Q9NSD9 Phenylalanine--tRNA ligase beta subunit                                  | SYFB (FARSB FARSLB, FRSB, HSPC173 )                       |
|                           |                                 |              |             |                                                    | Down-regulation (18)                                                            |                                                           |
|                           |                                 |              |             |                                                    | P04792 Heat shock protein beta-1                                                | HSPB1 (HSPB1 HSP27, HSP28 )                               |
|                           |                                 |              |             |                                                    | P06733 Alpha-enolase                                                            | ENOA (ENO1 ENO1L1, MBPB1, MPB1 )                          |
|                           |                                 |              |             |                                                    | P07900 Heat shock protein HSP 90-alpha                                          | HSP90A (HSP90AA1 HSP90A, HSPC1, HSPCA )                   |
|                           |                                 |              |             |                                                    | P09211 Glutathione S-transferase P                                              | GSTP1 (GSTP1 FAEES3, GST3 )                               |
|                           |                                 |              |             |                                                    | P13797 Plastin-3                                                                | PLST (PLS3)                                               |
|                           |                                 |              |             |                                                    | P16152 Carbonyl reductase [NADPH] 1                                             | CBR1 (CBR1)                                               |
|                           |                                 |              |             |                                                    | P28161 Glutathione S-transferase Mu 2                                           | GSTM2 (GSTM2 GST4 )                                       |
|                           |                                 |              |             |                                                    | P30084 Enoyl-CoA hydratase, mitochondrial                                       | ECHM (ECHS1)                                              |
|                           |                                 |              |             |                                                    | P30711 Glutathione S-transferase theta-1                                        | GSTT1 (GSTT1 )                                            |

|              |                         |                                   |                                   |                     |                      |                                                                                   |                                     |
|--------------|-------------------------|-----------------------------------|-----------------------------------|---------------------|----------------------|-----------------------------------------------------------------------------------|-------------------------------------|
|              |                         |                                   |                                   |                     | P35080               | Profilin-2                                                                        | PROF2 (PFN2)                        |
|              |                         |                                   |                                   |                     | P60981               | Destrin                                                                           | DEST (DSTN ACTDP, DSN )             |
|              |                         |                                   |                                   |                     | P61086               | Ubiquitin-conjugating enzyme E2 K                                                 | UBE2K (UBE2K HIP2, LIG )            |
|              |                         |                                   |                                   |                     | P62937               | Peptidyl-prolyl cis-trans isomerase A                                             | PPIA (PPIA CYPA )                   |
|              |                         |                                   |                                   |                     | P82279               | Protein crumbs homolog 1                                                          | CRUM1 (CRB1 )                       |
|              |                         |                                   |                                   |                     | Q16555               | Dihydropyrimidinase-related protein 2                                             | DPYL2 (DPYSL2 CRMP2, ULIP2 )        |
|              |                         |                                   |                                   |                     | Q99497               | Protein deglycase DJ-1                                                            | PARK7                               |
|              |                         |                                   |                                   |                     | Q9H299               | SH3 domain-binding glutamic acid-rich-like protein 3                              | SH3L3 (SH3BGR13 P1725 )             |
|              |                         |                                   |                                   |                     | Q9Y617               | Phosphoserine aminotransferase                                                    | SERC (PSAT1 PSA )                   |
| Caruso et al | N=22 (14/8)             | OCs (pre-DM)                      | LCs                               | 1D-SDS-PAGE         | Up-regulation (9)    |                                                                                   |                                     |
| 2014         |                         | n=7 (5/2)                         | n=8 (5/3)                         | HPLC-MS/MS          | O14732               | Inositol monophosphatase 2                                                        | IMPA2 (IMPA2 IMP.18P )              |
|              | Vastus lateralis biopsy | age 44 ± 4 y                      | age 46 ± 4 y                      |                     | P19474               | E3 ubiquitin-protein ligase TRIM21                                                | RO52 (TRIM21 RNF81, RO52, SSA1 )    |
|              |                         | BMI 32.5 ± 1.4 kg.m <sup>-2</sup> | BMI 23.2 ± 0.5 kg.m <sup>-2</sup> |                     | P21980               | Protein-glutamine gamma-glutamyltransferase 2                                     | TGM2 (TGM2)                         |
|              |                         |                                   |                                   |                     | P27986               | Phosphatidylinositol 3-kinase regulatory subunit alpha                            | P85A (PIK3R1 GRB1 )                 |
|              |                         | T2DM                              |                                   |                     | P30153               | Serine/threonine-protein phosphatase 2A 65 kDa regulatory subunit A alpha isoform | 2AAA (PPP2R1A)                      |
|              |                         | n=7 (4/3)                         |                                   |                     | P62753               | 40S ribosomal protein S6                                                          | RS6 (RPS6 OK/SW-cl.2 )              |
|              |                         | age 53 ± 4 y                      |                                   |                     | P62993               | Growth factor receptor-bound protein 2                                            | GRB2 (GRB2 ASH )                    |
|              |                         | BMI 32.8 ± 1.5 kg.m <sup>-2</sup> |                                   |                     | P67775               | Serine/threonine-protein phosphatase 2A catalytic subunit alpha isoform           | PP2AA (PPP2CA/B)                    |
|              |                         |                                   |                                   |                     | Q13061               | Triadin                                                                           | TRDN (TRDN)                         |
|              |                         |                                   |                                   |                     | Down-regulation (4)  |                                                                                   |                                     |
|              |                         |                                   |                                   |                     | O75083               | WD repeat-containing protein 1                                                    | WDR1 (WDR1 )                        |
|              |                         |                                   |                                   |                     | P05091               | Aldehyde dehydrogenase, mitochondrial                                             | ALDH2 (ALDH2 ALDM )                 |
|              |                         |                                   |                                   |                     | P33176               | Kinesin-1 heavy chain                                                             | KINH (KIF5B KNS, KNS1 )             |
|              |                         |                                   |                                   |                     | Q92901               | 60S ribosomal protein L3-like                                                     | RL3L (RPL3L)                        |
| Hussey       | N = 12 (8/4) at rest    | T2DM                              | Control                           | 1D-SDS-PAGE (4-20%) | Up-regulation (2)    |                                                                                   |                                     |
| 2013         |                         | n = 6 (4/2)                       | n = 6 (4/2)                       |                     | P02765               | Alpha-2-HS-glycoprotein                                                           | FETUA (AHSG FETUA, PRO2743)         |
|              | Vastus lateralis        | age 54 ± 4 y                      | age 48 ± 2 y                      | HPLC-MS/MS          | P02787               | Serotransferrin                                                                   | TF (TRFE)                           |
|              |                         | BMI 29 ± 2 kg.m <sup>-2</sup>     | BMI 28 ± 3 kg.m <sup>-2</sup>     |                     | Down-regulation (13) |                                                                                   |                                     |
|              |                         |                                   |                                   |                     | P00403               | Cytochrome c oxidase subunit 2                                                    | COX2 (MT-CO2 COII, COXII, MTCO2 )   |
|              |                         |                                   |                                   |                     | P00505               | Aspartate aminotransferase, mitochondrial                                         | AATM (GOT2)                         |
|              |                         |                                   |                                   |                     | P12882               | Myosin-1                                                                          | MYH1 (MYH1 )                        |
|              |                         |                                   |                                   |                     | P15121               | Aldose reductase                                                                  | ALDR (AKR1B1 ALDR1)                 |
|              |                         |                                   |                                   |                     | P17174               | Aspartate aminotransferase, cytoplasmic                                           | AATC (GOT1)                         |
|              |                         |                                   |                                   |                     | P24539               | ATP synthase F(0) complex subunit B1, mitochondrial                               | ATP5F1 (ATP5F1)                     |
|              |                         |                                   |                                   |                     | P25705               | ATP synthase subunit alpha, mitochondrial                                         | ATPA (ATP5A1 ATP5A, ATP5AL2, ATPM ) |
|              |                         |                                   |                                   |                     | P40926               | Malate dehydrogenase, mitochondrial                                               | MDHM (MDH2)                         |
|              |                         |                                   |                                   |                     | Q13011               | Delta(3,5)-Delta(2,4)-dienoyl-CoA isomerase, mitochondrial                        | ECH1                                |
|              |                         |                                   |                                   |                     | Q7Z4W1               | L-xylulose reductase                                                              | DCXR (DCXR SDR20C1 )                |
|              |                         |                                   |                                   |                     | Q8N335               | Glycerol-3-phosphate dehydrogenase 1-like protein                                 | GPD1L (GPD1L KIAA0089 )             |
|              |                         |                                   |                                   |                     | Q99623               | Prohibitin-2                                                                      | PHB2 (PHB2 BAP, REA )               |
|              |                         |                                   |                                   |                     | Q9UDW1               | Cytochrome b-c1 complex subunit 9                                                 | UCR9 (UQCR10 UCR1, HSPC119 )        |
