# Supplementary material for: A Systematic Review and Meta-Analysis of Proteomics Literature on the Response of Human Skeletal Muscle to Obesity/Type 2 Diabetes Mellitus (T2DM) Versus Exercise Training
Source: MDPI journal article supplement (doi:10.3390/proteomes5040030), 2017-11-11
Supplement: s1 [file s1]

Supplementary Table 2 summarises the main content (RQ2) of each article according to the PICO principle, which includes Population, Intervention, Comparison and Outcome measures. The earliest reported study meeting the eligibility criteria was done by Holloway et al (2009), therefore the current review considers literature over a 7 year study period from 2009 to 2015. Note-OB is obesity, MOB is Morbidly obese, T2DM is type 2 diabetes mellitus, HT is hypertension, OWHLT is overweight with healthy, LEHLT is lean with healthy, LEOW is lean with slightly overweight, NGT is non-glucose tolerance, OCs is Obese-control

\*presented significant difference at p-value <0.05 or under

| Reference                     | Participants (M/F)        | Study groups |                                   | Intervention          |                            |                        |                        |                 | Outcome measure                                                                                                         |                                                                                   |                              |
|-------------------------------|---------------------------|--------------|-----------------------------------|-----------------------|----------------------------|------------------------|------------------------|-----------------|-------------------------------------------------------------------------------------------------------------------------|-----------------------------------------------------------------------------------|------------------------------|
|                               |                           | Case         | Control                           | Modality              | Intensity                  | Volume (min/session)   | Frequency (times/week) | Duration (week) | Protein description                                                                                                     |                                                                                   |                              |
| Holloway 2009                 | N = 5 (5/0)               | One group    |                                   | Endurance             | 6x1 min                    | 30                     | 3                      | 6               | Up-regulation (4)                                                                                                       |                                                                                   |                              |
|                               |                           | Pre-post     |                                   | (motorised treadmill) | 90-100% V <sub>O2max</sub> |                        |                        |                 | P25705 ATP synthase subunit alpha, mitochondrial                                                                        | ATPA (ATP5A1 ATP5A, ATP5AL2, ATPM )                                               |                              |
|                               | age 21 ± 2 y              |              |                                   |                       |                            |                        |                        |                 | P06576 ATP synthase subunit beta, mitochondrial                                                                         | ATPB (ATP5B)                                                                      |                              |
|                               | Vastus lateralis (biopsy) |              |                                   |                       | 4 min                      |                        |                        |                 | P31040 Succinate dehydrogenase [ubiquinone] flavoprotein subunit, mitochondrial                                         | SDHA                                                                              |                              |
|                               |                           |              |                                   |                       | 50% V <sub>O2max</sub>     |                        |                        |                 | P40939 Trifunctional enzyme subunit alpha, mitochondrial                                                                | ECHA (HADHA HADH )                                                                |                              |
|                               | 1D-SDS-PAGE<br>LC-MS/MS   |              |                                   |                       |                            |                        |                        |                 |                                                                                                                         |                                                                                   |                              |
| Egan 2011                     | N = 8 (8/0)               | One group    |                                   | Endurance training    | 80% V <sub>O2max</sub>     | 60                     | everyday               | 2               | Up-regulation (21)                                                                                                      |                                                                                   |                              |
|                               | Age 23 ± 2 y              | Pre-post     |                                   | (cycling)             |                            |                        |                        | (14 d)          | P03915 NADH-ubiquinone oxidoreductase chain 5                                                                           | NU5M (MT-ND5 MTND5, NADH5, ND5)                                                   |                              |
|                               | BMI 23.6 ± 0.9 kg.m-2     |              |                                   |                       |                            |                        |                        |                 | P51970 NADH dehydrogenase [ubiquinone] 1 alpha subcomplex subunit 8                                                     | NDUA8 (NDUFAB8)                                                                   |                              |
|                               |                           |              |                                   |                       |                            |                        |                        |                 | Q9PQJ0 NADH dehydrogenase [ubiquinone] 1 alpha subcomplex subunit 13                                                    | NDUFA13 (NDUFA13 GRIM19, CDA016, CGI-39 )                                         |                              |
|                               | Vastus lateralis (biopsy) |              |                                   |                       |                            |                        |                        |                 | P25705 ATP synthase subunit alpha, mitochondrial                                                                        | ATPA (ATP5A1 ATP5A, ATP5AL2, ATPM )                                               |                              |
|                               | 2DIGE                     |              |                                   |                       |                            |                        |                        |                 | P00505 Aspartate aminotransferase, mitochondrial                                                                        | AATM (GOT2)                                                                       |                              |
|                               | LC-MS/MS                  |              |                                   |                       |                            |                        |                        |                 | P02144 Myoglobin                                                                                                        | MYG (MB)                                                                          |                              |
|                               |                           |              |                                   |                       |                            |                        |                        |                 | P04075 Fructose-bisphosphate aldolase A                                                                                 | ALDOA (ALDOA ALDA )                                                               |                              |
|                               |                           |              |                                   |                       |                            |                        |                        |                 | P04179 Superoxide dismutase [Mn], mitochondrial                                                                         | SODM (SOD2)                                                                       |                              |
|                               |                           |              |                                   |                       |                            |                        |                        |                 | P06576 ATP synthase subunit beta, mitochondrial                                                                         | ATPB (ATP5B)                                                                      |                              |
|                               |                           |              |                                   |                       |                            |                        |                        |                 | P07954 Fumarate hydratase, mitochondrial                                                                                | FUMH (FH)                                                                         |                              |
|                               |                           |              |                                   |                       |                            |                        |                        |                 | P09622 Dihydrolipoyl dehydrogenase, mitochondrial                                                                       | DLDH (DLD GCSL, LAD, PHE3 )                                                       |                              |
|                               |                           |              |                                   |                       |                            |                        |                        |                 | P15259 Phosphoglycerate mutase 2                                                                                        | PGAM2 (PGAM2 PGAMM )                                                              |                              |
|                               |                           |              |                                   |                       |                            |                        |                        |                 | P17540 Creatine kinase S-type, mitochondrial                                                                            | KCRS (CKMT2)                                                                      |                              |
|                               |                           |              |                                   |                       |                            |                        |                        |                 | P29590 Protein PML (Promyelocytic leukemia protein) (RING finger protein 71) (Tripartite motif-containing protein 19)   | PML (PML MYL, PP8675, RNF71, TRIM19 )                                             |                              |
|                               |                           |              |                                   |                       |                            |                        |                        |                 | P30086 Phosphatidylethanolamine-binding protein 1                                                                       | PEBP1 (PEBP1 PBP, PEBP )                                                          |                              |
|                               |                           |              |                                   |                       |                            |                        |                        |                 | P36957 Dihydrolipoyllysine-residue succinyltransferase component of 2-oxoglutarate dehydrogenase complex, mitochondrial | ODO2 (DLST)                                                                       |                              |
|                               |                           |              |                                   |                       |                            |                        |                        |                 | P40926 Malate dehydrogenase, mitochondrial                                                                              | MDHM (MDH2)                                                                       |                              |
|                               |                           |              |                                   |                       |                            |                        |                        |                 | P49411 Elongation factor Tu, mitochondria                                                                               | EFTU (TUFM)                                                                       |                              |
|                               |                           |              |                                   |                       |                            |                        |                        |                 | P60174 Triosephosphate isomerase                                                                                        | TPIS (TP11, TPI)                                                                  |                              |
|                               |                           |              |                                   |                       |                            |                        |                        |                 | P61604 10 kDa heat shock protein, mitochondrial                                                                         | CH10 (HSPE1)                                                                      |                              |
|                               |                           |              |                                   |                       |                            |                        |                        |                 | Q9UJ7 GTP-AMP phosphotransferase AK3, mitochondrial                                                                     | KAD3 (AK3)                                                                        |                              |
|                               |                           |              |                                   |                       |                            |                        |                        |                 | Down-regulation (5)                                                                                                     |                                                                                   |                              |
|                               |                           |              |                                   |                       |                            |                        |                        |                 | P20674 Cytochrome c oxidase subunit 5A, mitochondrial                                                                   | COX5A (COX5A)                                                                     |                              |
|                               |                           |              |                                   |                       |                            |                        |                        |                 | P02511 Alpha-crystallin B chain                                                                                         | CRYAB (CRYAB CRYA2, HSPB5)                                                        |                              |
|                               |                           |              |                                   |                       |                            |                        |                        |                 | O14983 Sarcoplasmic/endoplasmic reticulum calcium ATPase 1                                                              | AT2A1 (SERCA1)                                                                    |                              |
|                               |                           |              |                                   |                       |                            |                        |                        |                 | Q96A32 Myosin regulatory light chain 2, skeletal muscle isoform                                                         | MLRS (MYLPF)                                                                      |                              |
|                               |                           |              |                                   |                       |                            |                        |                        |                 | P11762 Galectin-1                                                                                                       | LEG1 (LGALS1)                                                                     |                              |
|                               | Hussey 2013               | N = 12 (8/4) | One group                         |                       | Endurance                  | 60 min                 | 60                     | 3 d/wk          | 4                                                                                                                       | Up-regulation (3)                                                                 |                              |
|                               |                           |              | Pre-post                          |                       |                            | 55% V <sub>O2max</sub> |                        |                 |                                                                                                                         | P02765 AHSG cDNA FLJ55606, highly similar to Alpha-2-HS-glycoprotein              | FETUA (AHSG, FETUA, PRO2743) |
|                               |                           | T2DM         |                                   |                       |                            |                        |                        |                 |                                                                                                                         | O95169 NADH dehydrogenase [ubiquinone] 1 beta subcomplex subunit 8, mitochondrial | NDU88 (NDUF88)               |
|                               |                           | (OW/OB)      |                                   |                       |                            | 6x5 min                | 30                     | 2 d/wk          |                                                                                                                         | P12882 Myosin-1                                                                   | MYH1 (MYH1 )                 |
|                               |                           | n = 6 (4/2)  |                                   |                       |                            | 70% V <sub>O2max</sub> |                        |                 |                                                                                                                         |                                                                                   |                              |
|                               |                           |              |                                   |                       |                            |                        |                        |                 | Down-regulation (3)                                                                                                     |                                                                                   |                              |
| age 54 ± 4 y                  |                           |              |                                   |                       |                            |                        |                        |                 | P02511 Alpha-crystallin B chain                                                                                         | CRYAB (CRYAB)                                                                     |                              |
|                               |                           |              |                                   |                       |                            |                        |                        |                 | P15121 Aldose reductase                                                                                                 | ALDR (AKR1B1 ALDR1)                                                               |                              |
| BMI 29 ± 2 kg.m <sup>-2</sup> |                           |              |                                   |                       |                            |                        |                        |                 | Q8N335 Glycerol-3-phosphate dehydrogenase 1-like protein                                                                | GPD1L (GPD1L KIAA0089 )                                                           |                              |
|                               |                           |              |                                   |                       |                            |                        |                        |                 |                                                                                                                         |                                                                                   |                              |
|                               | Vastus lateralis (biopsy) |              |                                   |                       |                            |                        |                        |                 |                                                                                                                         |                                                                                   |                              |
|                               | 1D-SDS-PAGE<br>LC-MS/MS   |              |                                   |                       |                            |                        |                        |                 |                                                                                                                         |                                                                                   |                              |
| Schild 2015                   | N = 10                    | ET & LE      | UT & LE/OW/OB                     | Endurance exercise    | na                         | 5h per week            |                        | >5 y            | Up-regulation (43)                                                                                                      |                                                                                   |                              |
|                               |                           |              |                                   |                       |                            |                        |                        |                 | O00330 Pyruvate dehydrogenase protein X component, mitochondrial                                                        | ODPX (PDHX PDX1 )                                                                 |                              |
|                               | Vastus lateralis (biopsy) |              | n = 5                             |                       |                            |                        |                        |                 | O43181 NADH dehydrogenase [ubiquinone] iron-sulfur protein 4, mitochondrial                                             | NDUS4 (NDUFS4)                                                                    |                              |
|                               |                           | n = 5        | Age 24 ± 5 y                      |                       |                            |                        |                        |                 | O75306 NADH dehydrogenase [ubiquinone] iron-sulfur protein 2, mitochondrial                                             | NDUS2 (NDUFS2)                                                                    |                              |
|                               |                           | Age 27 ± 2 y |                                   |                       |                            |                        |                        |                 | O75489 NADH dehydrogenase [ubiquinone] iron-sulfur protein 3, mitochondrial                                             | NDUS3 (NDUFS3)                                                                    |                              |
|                               |                           |              |                                   |                       |                            |                        |                        |                 | O75746 Calcium-binding mitochondrial carrier protein Aralar1                                                            | CMC1 (SLC25A12 ARALAR1 )                                                          |                              |
|                               |                           |              |                                   |                       |                            |                        |                        |                 | O75947 ATP synthase subunit d, mitochondrial                                                                            | ATP5H (ATP5H My032 )                                                              |                              |
|                               |                           |              |                                   |                       |                            |                        |                        |                 | P00403 Cytochrome c oxidase subunit 2                                                                                   | COX2 (MT-CO2 COII, COXII, MTCO2 )                                                 |                              |
|                               |                           |              |                                   |                       |                            |                        |                        |                 | P03915 NADH-ubiquinone oxidoreductase chain 5                                                                           | NU5M (MT-ND5 MTND5, NADH5, ND5)                                                   |                              |
|                               |                           |              |                                   |                       |                            |                        |                        |                 | P06576 ATP synthase subunit beta, mitochondrial                                                                         | ATPB (ATP5B)                                                                      |                              |
|                               |                           |              |                                   |                       |                            |                        |                        |                 | P11177 Pyruvate dehydrogenase E1 component subunit beta, mitochondrial                                                  | ODPB (PDHB PHE1B )                                                                |                              |
|                               |                           |              |                                   |                       |                            |                        |                        |                 | P12235 ADP/ATP translocase 1                                                                                            | ADT1 (SLC25A4 ANT1 )                                                              |                              |
|                               |                           |              |                                   |                       |                            |                        |                        |                 | P14854 Cytochrome c oxidase subunit 6B1                                                                                 | COX6B1 (COX6B1 COX6B )                                                            |                              |
|                               |                           |              |                                   |                       |                            |                        |                        |                 | P17540 Creatine kinase S-type, mitochondrial                                                                            | KCRS (CKMT2)                                                                      |                              |
|                               |                           |              |                                   |                       |                            |                        |                        |                 | P21912 Succinate dehydrogenase [ubiquinone] iron-sulfur subunit, mitochondrial                                          | SDHB (SDHB SDH, SDH1)                                                             |                              |
|                               |                           |              |                                   |                       |                            |                        |                        |                 | P24310 Cytochrome c oxidase subunit 7A1, mitochondrial                                                                  | COX7A1 (COX7A1 COX7AH )                                                           |                              |
|                               |                           |              |                                   |                       |                            |                        |                        |                 | P24539 ATP synthase F(0) complex subunit B1, mitochondrial                                                              | ATP5F1 (ATP5F1)                                                                   |                              |
|                               |                           |              |                                   |                       |                            |                        |                        |                 | P28331 NADH-ubiquinone oxidoreductase 75 kDa subunit, mitochondrial                                                     | NDUS1 (NDUFS1)                                                                    |                              |
|                               |                           |              |                                   |                       |                            |                        |                        |                 | P30038 Delta-1-pyrroline-5-carboxylate dehydrogenase, mitochondrial                                                     | ALA41 (ALDH4A1 ALDH4, P5CDH )                                                     |                              |
|                               |                           |              |                                   |                       |                            |                        |                        |                 | P31040 Succinate dehydrogenase [ubiquinone] flavoprotein subunit, mitochondrial                                         | SDHA                                                                              |                              |
|                               |                           | LC-MS/MS     | BMI 23.4 ± 1.6 kg.m <sup>-2</sup> | kg.m <sup>-2</sup>    |                            |                        |                        |                 |                                                                                                                         |                                                                                   |                              |

|        |                                                                             |                                         |
|--------|-----------------------------------------------------------------------------|-----------------------------------------|
| P36542 | ATP synthase subunit gamma, mitochondrial (F-ATPase gamma subunit)          | ATPG (ATP5C1 ATP5C, ATP5CL1)            |
| P48735 | Iso citrate dehydrogenase [NADP], mitochondrial                             | IDHP (IDH2)                             |
| P49748 | Very long-chain specific acyl-CoA dehydrogenase, mitochondrial              | ACADV (ACADVL)                          |
| P49753 | Acyl-coenzyme A thioesterase 2, mitochondrial                               | ACOT2                                   |
| P54819 | Adenylate kinase 2, mitochondrial                                           | KAD2 (AK2)                              |
| Q00325 | Phosphate carrier protein, mitochondrial                                    | MPCP (SLC25A3 PHC, OK/SW-cl.48)         |
| Q02218 | 2-oxoglutarate dehydrogenase, mitochondrial                                 | ODO1 (OGDH)                             |
| Q02978 | Mitochondrial 2-oxoglutarate/malate carrier protein                         | M2OM (SLC25A11 SLC20A4 )                |
| Q16795 | NADH dehydrogenase [ubiquinone] 1 alpha subcomplex subunit 9, mitochondrial | NDUA9 (NDUFA9 NDUFSZL)                  |
| Q96IX5 | Up-regulated during skeletal muscle growth protein 5                        | USMG5 (USMG5 DAPIIT, HCVFTP2, PD04912 ) |
| Q99643 | Succinate dehydrogenase cytochrome b560 subunit, mitochondrial              | C560 (SDHC CYB560, SDH3 )               |
| Q9HCC0 | Methylcrotonoyl-CoA carboxylase beta chain, mitochondrial                   | MCCB (MCCC2)                            |
| Q9P2R7 | Succinyl-CoA ligase [ADP-forming] subunit beta, mitochondrial               | SUCB1 (SUCLA2)                          |
| Q9Y2Z9 | Ubiquinone biosynthesis monooxygenase COQ6, mitochondrial                   | COQ6 (COQ6 CGI-10 )                     |
| Q9Y6C9 | Mitochondrial carrier homolog 2                                             | MTCH2 (MTCH2 MMP, HSPC032 )             |
| Q9Y8M9 | NADH dehydrogenase [ubiquinone] 1 beta subcomplex subunit 9                 | NDUB9 (NDUFB9 LYRM3, UQORZ2 )           |
| P31930 | Cytochrome b-c1 complex subunit 1, mitochondrial                            | QCR1 (UQCRC1)                           |
| O75964 | ATP synthase subunit g, mitochondrial                                       | ATPSL (ATP5L)                           |
| O75390 | Citrate synthase, mitochondrial                                             | CISY (CS)                               |
| Q99798 | Aconitate hydratase, mitochondrial                                          | ACON (ACO2)                             |
| P42126 | Enoyl-CoA delta isomerase 1, mitochondrial                                  | ECI1 (ECI1 DCI )                        |
| Q13011 | Delta(3,5)-Delta(2,4)-dienoyl-CoA isomerase, mitochondrial                  | ECH1                                    |
| Q53EW7 | Branched-chain-amino-acid aminotransferase                                  | Q53EW7 (BCAT2)                          |
| O75208 | Ubiquinone biosynthesis protein COQ9, mitochondrial                         | COQ9 (COQ9)                             |

---
