# Supplementary material for: A Systematic Review and Meta-Analysis of Proteomics Literature on the Response of Human Skeletal Muscle to Obesity/Type 2 Diabetes Mellitus (T2DM) Versus Exercise Training
Source: MDPI journal article supplement (doi:10.3390/proteomes5040030), 2017-11-11
Supplement: s1 [file s1]

| + in OB/T2DM | Function                         | Uniprot | Description                                                                       |                                                           |
|--------------|----------------------------------|---------|-----------------------------------------------------------------------------------|-----------------------------------------------------------|
|              | Adipogenesis                     | Q9H7C9  | Mth938 domain-containing protein                                                  | AAMDC (AAMDC C11orf67, PTD015 )                           |
|              | Amino acid biosynthesis          | P34897  | Serine hydroxymethyltransferase, mitochondrial                                    | GLYM (SHMT2)                                              |
|              | Antioxidant                      | P30044  | Peroxisredoxin-5, mitochondrial                                                   | PRDX5 (PRDX5 ACR1, SBB110 )                               |
|              | Antioxidant                      | P32119  | Peroxisredoxin-2                                                                  | PRDX2 (Prdx2 Tdpx1, Tpx)                                  |
|              | Binding protein (ATP, NT)        | Q9NSD9  | Phenylalanine--tRNA ligase beta subunit                                           | SYFB (FARSB FARSLB, FRSB, HSPC173 )                       |
|              | Binding protein (ATP,DNA,NT,RNA) | Q92499  | ATP-dependent RNA helicase DDX1                                                   | DDX1 (DDX1)                                               |
|              | Binding protein (Ca2+)           | P21980  | Protein-glutamine gamma-glutamyltransferase 2                                     | TGM2 (TGM2)                                               |
|              | Binding protein (Ca2+)           | P54289  | Voltage-dependent calcium channel subunit alpha-2/delta-1                         | CA2D1 (CACNA2D1 CACNL2A, CCHL2A, MHS3 )                   |
|              | Binding protein (DNA,ATP,NT)     | P13010  | X-ray repair cross-complementing protein 5                                        | XRCC5 (XRCC5 G22P2 )                                      |
|              | Binding protein (DNA,RNA)        | Q92945  | Far upstream element-binding protein 2                                            | FUBP2 (KHSPF FUBP2 )                                      |
|              | Binding protein (Fe2+,Fe3+)      | P02787  | Serotransferrin                                                                   | TF (TRFE)                                                 |
|              | Binding protein (RNA)            | O75534  | Cold shock domain-containing protein E1                                           | CSDE1 (CSDE1 D1S155E, KIAA0885, NRU, UNR )                |
|              | Binding protein (RNA)            | P14866  | Heterogeneous nuclear ribonucleoprotein L                                         | HNRPL (HNRNPL HNRPL, P/OKcl.14 )                          |
|              | Binding protein (RNA)            | P27105  | Erythrocyte band 7 integral membrane protein                                      | STOM (STOM)                                               |
|              | Binding protein (RNA)            | P62753  | 40S ribosomal protein S6                                                          | RS6 (RPS6 OK/SW-cl.2 )                                    |
|              | Chromosome rearrangement         | P30153  | Serine/threonine-protein phosphatase 2A 65 kDa regulatory subunit A alpha isoform | 2AAA (PPP2R1A)                                            |
|              | Chromosome rearrangement         | Q13263  | Transcription intermediary factor 1-beta                                          | TIF1B (TRIM28 KAP1, RNF96, TIF1B )                        |
|              | DNA repair                       | Q14191  | Werner syndrome ATP-dependent helicase                                            | WRN (WRN RECQ3, RECQL2 )                                  |
|              | ECM                              | P02679  | Fibrinogen gamma chain                                                            | FIBG (FGG PRO2061 )                                       |
|              | ECM                              | P12109  | Collagen alpha-1(VI) chain                                                        | COL6A1 (COL6A1)                                           |
|              | ECM                              | P24821  | Tenascin                                                                          | TENA (TNC)                                                |
|              | ECM                              | Q02809  | Procollagen-lysine-2-oxoglutarate 5-dioxygenase 1                                 | PLOD1 (PLOD1 LLH, PLOD)                                   |
|              | ECM                              | P06732  | Creatine kinase M-type                                                            | KCRM (KCRM )                                              |
|              | ECM                              | Q99623  | Prohibitin-2                                                                      | PHB2 (PHB2)                                               |
|              | Glucose metabolism               | P04406  | Glyceraldehyde-3-phosphate dehydrogenase                                          | G3P (GAPDH GAPD, CDABP0047, OK/SW-cl.12 )                 |
|              | Glucose metabolism               | P13929  | Beta-enolase                                                                      | ENOB (ENO3)                                               |
|              | Glucose metabolism               | P14618  | Pyruvate kinase PKM                                                               | KYPM (PKM OIP3, PK2, PK3, PKM2 )                          |
|              | Glucose metabolism               | P36871  | Phosphoglucomutase-1                                                              | PGM1 (PGM1 )                                              |
|              | Immune response                  | P27986  | Phosphatidylinositol 3-kinase regulatory subunit alpha                            | P85A (PIK3R1 GRB1 )                                       |
|              | Immune response                  | P60842  | Eukaryotic initiation factor 4A-I                                                 | IF4A1 (EIF4A1)                                            |
|              | Immune response                  | P62993  | Growth factor receptor-bound protein 2                                            | GRB2 (GRB2 ASH )                                          |
|              | Immune response                  | Q12906  | Interleukin enhancer-binding factor 3                                             | ILF3 (ILF3 DRBF, MPHOSPH4, NF90 )                         |
|              | Lipid metabolism                 | P05413  | Fatty acid-binding protein, heart                                                 | FABPH (FABP3 FABP11, MDG1 )                               |
|              | Lipid metabolism                 | P14061  | Estradiol 17-beta-dehydrogenase 1                                                 | DHB1 (HSD17B1 E17KSR, EDH17B1, EDH17B2, EDHB17, SDR28C1 ) |
|              | Lipid metabolism                 | P23786  | Carnitine O-palmitoyltransferase 2, mitochondrial                                 | CPT2 (CPT2 CPT1 )                                         |
|              | Lipid metabolism                 | P55084  | Trifunctional enzyme subunit beta, mitochondrial                                  | ECHB (HADHB MSTP029 )                                     |
|              | Lysosome                         | Q9UHG3  | Prenylcysteine oxidase 1                                                          | PCYOX (PCYOX1 KIAA0908, PCL1, UNQ597/PRO1183 )            |
|              | Muscle                           | P05976  | Myosin light chain 1/3, skeletal muscle isoform                                   | MYL1                                                      |
|              | Muscle                           | P11055  | Myosin-3                                                                          | MYH3 (MYH3 )                                              |
|              | Muscle                           | P11217  | Glycogen phosphorylase, muscle form                                               | PYGM (PYGM )                                              |
|              | Muscle                           | P13535  | Myosin-8                                                                          | MYH8 (MYH8 )                                              |
|              | Muscle                           | P45378  | Troponin T, fast skeletal muscle                                                  | TNNT3 (TNNT3)                                             |
|              | Muscle                           | P63267  | Actin, gamma-enteric smooth muscle                                                | ACTH (ACTG2 ACTA3, ACTL3, ACTSG )                         |
|              | Muscle                           | Q13061  | Triadin                                                                           | TRDN (TRDN)                                               |
|              | Muscle                           | Q9UKX2  | Myosin-2                                                                          | MYH2 (MYH2 MYHSA2 )                                       |
|              | Muscle                           | Q9Y2K3  | Myosin-15                                                                         | MYH15 (MYH15 KIAA1000)                                    |
|              | Muscle                           | Q96A32  | Myosin regulatory light chain 2, skeletal muscle isoform                          | MLRS (MYLPF)                                              |
|              | OXPHOS                           | O94760  | N(G),N(G)-dimethylarginine dimethylaminohydrolase 1                               | DDAH1 (DDAH1 DDAH )                                       |
|              | OXPHOS                           | P38117  | Electron transfer flavoprotein subunit beta                                       | ETFB (ETFB FP585 )                                        |
|              | OXPHOS                           | P06576  | ATP synthase subunit beta, mitochondrial                                          | ATPB (ATP5B)                                              |
|              | Porin                            | O96008  | Mitochondrial import receptor subunit TOM40 homolog                               | TOM40 (TOMM40 C19orf1, PEREC1, TOM40 )                    |
|              | Protein biosynthesis             | P47897  | Glutamine--tRNA ligase                                                            | SYQ (QARS)                                                |
|              | Protein biosynthesis             | P67775  | Serine/threonine-protein phosphatase 2A catalytic subunit alpha isoform           | PP2AA (PPP2CA/B)                                          |
|              | Protein rearrangement            | P30101  | Protein disulfide-isomerase A3                                                    | PDIA3 (PDIA3 ERP57, ERP60, GRP58 )                        |
|              | Repressor                        | Q14469  | Transcription factor HES-1                                                        | HES1 (HES1 BHLHB39, HL, HRY )                             |
|              | Skeletal muscle specific protein | P83111  | Serine beta-lactamase-like protein LACTB, mitochondrial                           | LACTB (LACTB MRPL56, UNQ843/PRO1781 )                     |
|              | Stress reponse                   | O14558  | Heat shock protein beta-6                                                         | HSPB6 (HSPB6 )                                            |
|              | Stress reponse                   | P08238  | Heat shock protein HSP 90-beta                                                    | HSP90AB1 (HSP90AB1 HSP90B, HSPC2, HSPCB )                 |
|              | Stress reponse                   | P11021  | 78 kDa glucose-regulated protein                                                  | GRP78 (HSPA5 GRP78 )                                      |
|              | Stress reponse                   | P19474  | E3 ubiquitin-protein ligase TRIM21                                                | RO52 (TRIM21 RNF81, RO52, SSA1 )                          |
|              | Stress reponse                   | P42765  | 3-ketoacyl-CoA thiolase, mitochondrial                                            | THIM (ACAA2)                                              |
|              | Stress reponse                   | P49720  | Proteasome subunit beta type-3                                                    | PSB3 (PSMB3)                                              |
|              | Stress reponse                   | P50990  | T-complex protein 1 subunit theta                                                 | TCPQ (CCT8 C21orf112, CCTQ, KIAA0002 )                    |
|              | Stress reponse                   | P50991  | T-complex protein 1 subunit delta                                                 | TCPD (CCT4 CCTD, SRB)                                     |
|              | Stress reponse                   | P54652  | Heat shock-related 70 kDa protein 2                                               | HSP72 (HSPA2)                                             |
|              | Stress reponse                   | Q12931  | Heat shock protein 75 kDa, mitochondrial                                          | TRAP1 (TRAP1 HSP75 )                                      |
|              | Stress reponse                   | Q16543  | Hsp90 co-chaperone Cdc37                                                          | CDC37 (CDC37 CDC37A )                                     |
|              | Structure                        | Q93034  | Cullin-5                                                                          | CUL5 (CUL5 VACM1 )                                        |
|              | Structure                        | Q9Y281  | Cofilin-2                                                                         | COF2 (CFL2)                                               |
|              | TCA                              | O75323  | Protein NipSnap homolog 2                                                         | NIPS2 (GBAS NIPSNAP2 )                                    |
|              | TCA                              | P40925  | Malate dehydrogenase, cytoplasmic                                                 | MDHC (MDH1, MDHA)                                         |
|              | TCA                              | P50213  | Isocitrate dehydrogenase [NAD] subunit alpha, mitochondrial                       | IDH3A (IDH3A)                                             |
|              | Visual involvement               | A6NNS2  | Dehydrogenase/reductase SDR family member 7C                                      | DRS7C (DHRS7C SDR32C2 )                                   |

| - in OB/T2DM | Function                       | Uniprot | Description                                                          |                                         |
|--------------|--------------------------------|---------|----------------------------------------------------------------------|-----------------------------------------|
|              | Structure                      | O75083  | WD repeat-containing protein 1                                       | WDR1 (WDR1 )                            |
|              | Structure                      | Q92901  | 60S ribosomal protein L3-like                                        | RL3L (RPL3L)                            |
|              | Structure                      | Q9H299  | SH3 domain-binding glutamic acid-rich-like protein 3                 | SH3L3 (SH3BGR1.3 P1725 )                |
|              | Structure                      | Q9NP98  | Myozenin-1                                                           | MYOZ1                                   |
|              | Structure                      | P40123  | Adenylyl cyclase-associated protein 2                                | CAP2 (CAP2)                             |
|              | Structure                      | P17661  | Desmin                                                               | DESM (DES)                              |
|              | Structure                      | P60981  | Destrin                                                              | DEST (DSTN ACTDP, DSN )                 |
|              | Structure                      | P35080  | Profilin-2                                                           | PROF2 (PFN2)                            |
|              | Stress response                | O14558  | Heat shock protein beta-6                                            | HSPB6 (HSPB6 )                          |
|              | Stress response                | Q99497  | Protein deglycase DJ-1                                               | PARK7                                   |
|              | Stress response                | P07900  | Heat shock protein HSP 90-alpha                                      | HSP90A (HSP90AA1 HSP90A, HSPC1, HSPCA ) |
|              | Stress response                | P61086  | Ubiquitin-conjugating enzyme E2 K                                    | UBE2K (UBE2K HIP2, LIG )                |
|              | Stress response                | P04792  | Heat shock protein beta-1                                            | HSPB1 (HSPB1 HSP27, HSP28 )             |
|              | Repressor                      | Q9NX63  | MICOS complex subunit MIC19                                          | MIC19 (CHCHD3 MIC19, MINOS3 )           |
|              | Prevent neurodegeneration      | P09211  | Glutathione S-transferase P                                          | GSTP1 (GSTP1 FAEES3, GST3 )             |
|              | Prevent neurodegeneration      | P28161  | Glutathione S-transferase Mu 2                                       | GSTM2 (GSTM2 GST4 )                     |
|              | Prevent neurodegeneration      | P16152  | Carbonyl reductase 1                                                 |                                         |
|              | Prevent neurodegeneration      | P30711  | Glutathione S-transferase theta-1                                    | GSTT1 (GSTT1 )                          |
|              | OXPHOS                         | E9PQ53  | NADH dehydrogenase [ubiquinone] 1 subunit C2, isoform 2              | NDUCR (NDUFC2-KCTD14 )                  |
|              | OXPHOS                         | Q86Y39  | NADH dehydrogenase [ubiquinone] 1 alpha subcomplex subunit 11        | NDUAB (NDUFA11)                         |
|              | OXPHOS                         | Q9UDW1  | Cytochrome b-c1 complex subunit 9                                    | UCR9 (UQCRI10 UCRC, HSPC119 )           |
|              | OXPHOS                         | P10606  | Cytochrome c oxidase subunit 5B, mitochondrial                       | COX5B (COX5B)                           |
|              | OXPHOS                         | P14927  | Cytochrome b-c1 complex subunit 7                                    | QCR7 (UQCRB UQBP )                      |
|              | OXPHOS                         | P00403  | Cytochrome c oxidase subunit 2                                       | COX2 (MT-CO2 COII, COXII, MTCO2 )       |
|              | OXPHOS                         | P24539  | ATP synthase F(0) complex subunit B1, mitochondrial                  | ATP5F1 (ATP5F1)                         |
|              | Muscle                         | O14958  | Calsequestrin-2                                                      | CASQ2 (CASQ2)                           |
|              | Muscle                         | Q6ZMU5  | Tripartite motif-containing protein 72                               | TRIF2 (TRIM72 MG53 )                    |
|              | Muscle                         | P10916  | Myosin regulatory light chain 2, ventricular/cardiac muscle isoform  | MLRV                                    |
|              | Muscle                         | P35609  | Alpha-actinin-2                                                      | ACTN2 (ACTN2)                           |
|              | Muscle                         | P08590  | Myosin light chain 3                                                 | MYL3 (MYL3 )                            |
|              | Muscle                         | P13805  | Troponin T, slow skeletal muscle                                     | TNNT1 (TNNT1 TNT )                      |
|              | Muscle                         | P13797  | Plastin-3                                                            | PLST (PLS3)                             |
|              | Muscle                         | P62736  | Actin, aortic smooth muscle                                          | ACTA (ACTA2 ACTSA, ACTVS, GIG46 )       |
|              | Motor protein (binding ATP,NT) | P33176  | Kinesin-1 heavy chain                                                | KINH (KIF5B KNS, KNS1 )                 |
|              | Lipid metabolism               | Q92523  | Carnitine O-palmitoyltransferase 1, muscle isoform                   | CPT1B                                   |
|              | Lipid metabolism               | P30084  | Enoyl-CoA hydratase, mitochondrial                                   | ECHM (ECHS1)                            |
|              | Immune response                | P40121  | Macrophage-capping protein                                           | CAPG (CAPG AFCP, MCP)                   |
|              | Immune response                | P62937  | Peptidyl-prolyl cis-trans isomerase A                                | PPIA (PPIA CYPA )                       |
|              | Glucose metabolism             | Q7Z4W1  | L-xylulose reductase                                                 | DCXR (DCXR SDR20C1 )                    |
|              | Glucose metabolism             | P06733  | Alpha-enolase                                                        | ENOA (ENO1 ENO1L1, MBPB1, MPB1 )        |
|              | ETOH                           | P00325  | Alcohol dehydrogenase 1B                                             | ADHB1 (ADH1B ADH2 )                     |
|              | ETOH                           | P05091  | Aldehyde dehydrogenase, mitochondrial                                | ALDH2 (ALDH2 ALDM )                     |
|              | ECM                            | P00813  | Adenosine deaminase                                                  | ADA (ADA ADA1)                          |
|              | Developmental protein          | Q16555  | Dihydropyrimidinase-related protein 2                                | DPYL2 (DPYSL2 CRMP2, ULIP2 )            |
|              | Binding protein (Ca2+)         | P82279  | Protein crumbs homolog 1                                             | CRUM1 (CRB1 )                           |
|              | Binding protein (ATP,NT)       | P05166  | Propionyl-CoA carboxylase beta chain, mitochondrial                  | PCCB (PCCB )                            |
|              | Amino acid biosynthesis        | Q02252  | Methylmalonate-semialdehyde dehydrogenase [acylating], mitochondrial | MMSA (ALDH6A1 MMSDH )                   |
|              | Amino acid biosynthesis        | Q9Y617  | Phosphoserine aminotransferase                                       | SERC (PSAT1 PSA )                       |
|              | Amino acid biosynthesis        | P17174  | Aspartate aminotransferase, cytoplasmic                              | AATC (GOT1)                             |

| + in Trained | Function                         | Uniprot | Description                                                                                                      |                                           |
|--------------|----------------------------------|---------|------------------------------------------------------------------------------------------------------------------|-------------------------------------------|
|              | Amino acid biosynthesis          | Q53EW7  | Branched-chain-amino-acid aminotransferase                                                                       | Q53EW7 (BCAT2)                            |
|              | Binding protein (Ca2+)           | O75746  | Calcium-binding mitochondrial carrier protein Aralar1                                                            | CMC1 (SLC25A12 ARALAR1 )                  |
|              | ECM                              | P17540  | Creatine kinase S-type, mitochondrial                                                                            | KCRS (CKMT2)                              |
|              | ECM                              | P17540  | Creatine kinase S-type, mitochondrial                                                                            | KCRS (CKMT2)                              |
|              | Glucose metabolism               | P60174  | Triosephosphate isomerase                                                                                        | TPIS (TPI1, TPI)                          |
|              | Glucose metabolism               | P04075  | Fructose-bisphosphate aldolase A                                                                                 | ALDOA (ALDOA ALDA )                       |
|              | Glucose metabolism               | P04075  | Fructose-bisphosphate aldolase A                                                                                 | ALDOA (ALDOA ALDA )                       |
|              | Immune response                  | P12235  | ADP/ATP translocase 1                                                                                            | ADT1 (SLC25A4 ANT1 )                      |
|              | Lipid metabolism                 | P09622  | Dihydrolipoyl dehydrogenase, mitochondrial                                                                       | DLDH (DLD GCSL, LAD, PHE3 )               |
|              | Lipid metabolism                 | P40939  | Trifunctional enzyme subunit alpha, mitochondrial                                                                | ECHA (HADHA HADH )                        |
|              | Lipid metabolism                 | P42126  | Enoyl-CoA delta isomerase 1, mitochondrial                                                                       | ECI1 (ECI1 DC1 )                          |
|              | Lipid metabolism                 | P49753  | Acyl-coenzyme A thioesterase 2, mitochondrial                                                                    | ACOT2                                     |
|              | Muscle                           | P02144  | Myoglobin                                                                                                        | MYG (MB)                                  |
|              | NT homeostasis                   | P54819  | Adenylate kinase 2, mitochondrial                                                                                | KAD2 (AK2)                                |
|              | OXPHOS                           | O43181  | NADH dehydrogenase [ubiquinone] iron-sulfur protein 4, mitochondrial                                             | NDUS4 (NDUFS4)                            |
|              | OXPHOS                           | O75208  | Ubiquinone biosynthesis monooxygenase COQ9, mitochondrial                                                        | COQ9 (COQ9)                               |
|              | OXPHOS                           | O75489  | NADH dehydrogenase [ubiquinone] iron-sulfur protein 3, mitochondrial                                             | NDUS3 (NDUFS3)                            |
|              | OXPHOS                           | O75947  | ATP synthase subunit d, mitochondrial                                                                            | ATP5H (ATP5H My032 )                      |
|              | OXPHOS                           | O75964  | ATP synthase subunit g, mitochondrial                                                                            | ATP5L (ATP5L)                             |
|              | OXPHOS                           | P03915  | NADH-ubiquinone oxidoreductase chain 5                                                                           | NU5M (MT-ND5 MTND5, NADH5, ND5)           |
|              | OXPHOS                           | P31930  | Cytochrome b-c1 complex subunit 1, mitochondrial                                                                 | QCR1 (UQCRC1)                             |
|              | OXPHOS                           | Q9P0J0  | NADH dehydrogenase [ubiquinone] 1 alpha subcomplex subunit 13                                                    | NDUFA13 (NDUFA13 GRIM19, CDA016, CGI-39 ) |
|              | OXPHOS                           | Q9Y2Z9  | Ubiquinone biosynthesis monooxygenase COQ6, mitochondrial                                                        | COQ6 (COQ6 CGI-10 )                       |
|              | OXPHOS                           | Q9Y6M9  | NADH dehydrogenase [ubiquinone] 1 beta subcomplex subunit 9                                                      | NDUB9 (NDUFB9 LYRM3, UQOR22 )             |
|              | OXPHOS                           | Q16795  | NADH dehydrogenase [ubiquinone] 1 alpha subcomplex subunit 9, mitochondrial                                      | NDUA9 (NDUFA9 NDUFS2L)                    |
|              | OXPHOS                           | P36542  | ATP synthase subunit gamma, mitochondrial (F-ATPase gamma subunit)                                               | ATPG (ATP5C1 ATP5C, ATP5CL1)              |
|              | OXPHOS                           | P28331  | NADH-ubiquinone oxidoreductase 75 kDa subunit, mitochondrial                                                     | NDUS1 (NDUFS1)                            |
|              | OXPHOS                           | P24539  | ATP synthase F(0) complex subunit B1, mitochondrial                                                              | ATP5F1 (ATP5F1)                           |
|              | OXPHOS                           | P24310  | Cytochrome c oxidase subunit 7A1, mitochondrial                                                                  | COX7A1 (COX7A1 COX7AH )                   |
|              | OXPHOS                           | P14854  | Cytochrome c oxidase subunit 6B1                                                                                 | COX6B1 (COX6B1 COX6B )                    |
|              | OXPHOS                           | P00403  | Cytochrome c oxidase subunit 2                                                                                   | COX2 (MT-CO2 COII, COXII, MTCO2 )         |
|              | OXPHOS                           | P06576  | ATP synthase subunit beta, mitochondrial                                                                         | ATPB (ATP5B)                              |
|              | OXPHOS                           | P03915  | NADH-ubiquinone oxidoreductase chain 5                                                                           | NU5M (MT-ND5 MTND5, NADH5, ND5)           |
|              | Porin                            | Q9Y2R7  | Voltage-dependent anion-selective channel protein 3                                                              | VDAC3 (VDAC3 )                            |
|              | Skeletal muscle specific protein | Q96IX5  | Up-regulated during skeletal muscle growth protein 5                                                             | USMG5 (USMG5 DAPIT, HCVFPT2, PD04912 )    |
|              | Stress reponse                   | P04179  | Superoxide dismutase [Mn], mitochondrial                                                                         | SODM (SOD2)                               |
|              | Stress reponse                   | Q9Y6C9  | Mitochondrial carrier homolog 2                                                                                  | MTCH2 (MTCH2 MIMP, HSPC032 )              |
|              | Stress reponse                   | P61604  | 10 kDa heat shock protein, mitochondrial                                                                         | CH10 (HSPE1)                              |
|              | Structure                        | Q00325  | Phosphate carrier protein, mitochondrial                                                                         | MPCP (SLC25A3 PHC, OK/SW-cl48 )           |
|              | Structure                        | Q02978  | Mitochondrial 2-oxoglutarate/malate carrier protein                                                              | M2OM (SLC25A11 SLC20A4 )                  |
|              | TCA                              | O00330  | Pyruvate dehydrogenase protein X component, mitochondrial                                                        | ODPX (PDHX PDX1 )                         |
|              | TCA                              | P07954  | Fumarate hydratase, mitochondrial                                                                                | FUMH (FH)                                 |
|              | TCA                              | P30086  | Phosphatidylethanolamine-binding protein 1                                                                       | PEBP1 (PEBP1 PBP, PEBP )                  |
|              | TCA                              | P36957  | Dihydrolipoyllysine-residue succinyltransferase component of 2-oxoglutarate dehydrogenase complex, mitochondrial | ODO2 (DLST)                               |
|              | TCA                              | P48735  | Isocitrate dehydrogenase [NADP], mitochondrial                                                                   | IDHP (IDH2)                               |
|              | TCA                              | Q02218  | 2-oxoglutarate dehydrogenase, mitochondrial                                                                      | ODO1 (OGDH)                               |
|              | TCA                              | Q99643  | Succinate dehydrogenase cytochrome b560 subunit, mitochondrial                                                   | C560 (SDHC CYB560, SDH3 )                 |
|              | TCA                              | P31040  | Succinate dehydrogenase [ubiquinone] flavoprotein subunit, mitochondrial                                         | SDHA                                      |
|              | TCA                              | P30038  | Delta-1-pyrroline-5-carboxylate dehydrogenase, mitochondrial                                                     | AL4A1 (ALDH4A1 ALDH4, P5CDH )             |
|              | TCA                              | P11177  | Pyruvate dehydrogenase E1 component subunit beta, mitochondrial                                                  | ODPB (PDHB PHE1B )                        |
|              | TCA                              | P21912  | Succinate dehydrogenase [ubiquinone] iron-sulfur subunit, mitochondrial                                          | SDHB (SDHB SDH, SDH1)                     |

| - in Trained | Function       | Uniprot | Description                                    |                            |
|--------------|----------------|---------|------------------------------------------------|----------------------------|
|              | Stress reponse | P02511  | Alpha-crystallin B chain                       | CRYAB (CRYAB CRYA2, HSPB5) |
|              | Stress reponse | P11762  | Galectin-1                                     | LEG1 (LGALS1)              |
|              | OXPHOS         | P20674  | Cytochrome c oxidase subunit 5A, mitochondrial | COX5A (COX5A)              |

| + in OB/T2DM, - in Trained | Function | Uniprot | Description                                              |                |
|----------------------------|----------|---------|----------------------------------------------------------|----------------|
|                            | Muscle   | Q96A32  | Myosin regulatory light chain 2, skeletal muscle isoform | MLRS (MYLPP)   |
|                            | Muscle   | O14983  | Sarcoplasmic/endoplasmic reticulum calcium ATPase 1      | AT2A1 (SERCA1) |

| - in OB/T2DM, + in Trained | Function         | Uniprot | Description                                                                |                |
|----------------------------|------------------|---------|----------------------------------------------------------------------------|----------------|
|                            | Lipid metabolism | P00505  | Aspartate aminotransferase, mitochondrial                                  | AATM (GOT2)    |
|                            | OXPHOS           | O75306  | NADH dehydrogenase [ubiquinone] iron-sulfur protein 2, mitochondrial       | NDUS2 (NDUFS2) |
|                            | OXPHOS           | O95169  | NADH dehydrogenase [ubiquinone] 1 beta subcomplex subunit 8, mitochondrial | NDUB8 (NDUFB8) |
|                            | OXPHOS           | P06576  | ATP synthase subunit beta, mitochondrial                                   | ATPB (ATP5B)   |
|                            | OXPHOS           | P51970  | NADH dehydrogenase [ubiquinone] 1 alpha subcomplex subunit 8               | NDUA8 (NDUFA8) |

| ± in OB/T2DM, + in Trained | Function           | Uniprot | Description                                                                  |
|----------------------------|--------------------|---------|------------------------------------------------------------------------------|
|                            | Glucose metabolism | P15259  | Phosphoglycerate mutase 2PGAM2 (PGAM2 PGAMM )                                |
|                            | Lipid metabolism   | P00505  | Aspartate aminotransferase, mitochondrialAATM (GOT2)                         |
|                            | Muscle             | P12882  | Myosin-1MYH1 (MYH1 )                                                         |
|                            | OXPHOS             | P25705  | ATP synthase subunit alpha, mitochondrialATPA (ATP5A1 ATP5A, ATP5AL2, ATPM ) |

| + in OB/T2DM, + in Trained | Function                  | Uniprot | Description                                                              |                             |
|----------------------------|---------------------------|---------|--------------------------------------------------------------------------|-----------------------------|
|                            | TCA                       | O75390  | Citrate synthase, mitochondrial                                          | CISY (CS)                   |
|                            | TCA                       | P31040  | Succinate dehydrogenase [ubiquinone] flavoprotein subunit, mitochondrial | SDHA                        |
|                            | TCA                       | Q99798  | Aconitate hydratase, mitochondrial                                       | ACON (ACO2)                 |
|                            | Stress reponse            | P49411  | Elongation factor Tu, mitochondria                                       | EFTU (TUFM)                 |
|                            | Lipid metabolism          | P49748  | Very long-chain specific acyl-CoA dehydrogenase, mitochondrial           | ACADV (ACADVL)              |
|                            | Glucose metabolism        | P15259  | Phosphoglycerate mutase 2                                                | PGAM2 (PGAM2 PGAMM )        |
|                            | ECM                       | P02765  | Alpha-2-HS-glycoprotein                                                  | FETUA (AHSG FETUA, PRO2743) |
|                            | Binding protein (ATP, NT) | Q9HCC0  | Methylcrotonoyl-CoA carboxylase beta chain, mitochondrial                | MCCB (MCCC2)                |



| - in OB/T2DM, - in Trained | Function           | Uniprot | Description                                       |                         |
|----------------------------|--------------------|---------|---------------------------------------------------|-------------------------|
|                            | Glucose metabolism | P15121  | Aldose reductase                                  | ALDR (AKR1B1 ALDR1)     |
|                            | Lipid metabolism   | Q8N335  | Glycerol-3-phosphate dehydrogenase 1-like protein | GPD1L (GPD1L KIAA0089 ) |

| ± in OB/T2DM only | Function                              | Uniprot | Description              |                 |
|-------------------|---------------------------------------|---------|--------------------------|-----------------|
|                   | Binding protein (FE2+,Fe3+, O2, heme) | P69905  | Hemoglobin subunit alpha | HBA (HBA1 HBA2) |
|                   | Lipid metabolism                      | P02647  | Apolipoprotein A-I       | APOA1 (APOA1)   |
